# Supplementary material for: Controllable synthesis of a Pd/PdO nanocomposite as a catalyst for hydrogenation of nitroarenes to anilines in water
Source: Royal Society of Chemistry journal article supplement (doi:10.1039/c6ra06900b), 2016-01-01
Supplement: c6ra06900b1.pdf [file c6ra06900b1.pdf]

## **Controllable synthesis of Pd/PdO nanocomposite as catalyst for hydrogenation of nitroarenes to anilines in water**

Fan Yang,<sup>a‡</sup> Sen Dong,<sup>a‡</sup> Chunxia Wang,<sup>b‡</sup> and Yongfeng Li,<sup>a\*</sup>

<sup>a</sup> State Key Laboratory of Heavy Oil Processing, China University of Petroleum, Beijing, Changping 102249, China. Phone/Fax: +86-010-89739028. yfli@cup.edu.cn.

<sup>b</sup> Beijing National Laboratory for Molecular Sciences, Key Laboratory of Analytical Chemistry for Living Biosystems, Institute of Chemistry, the Chinese Academy of Sciences, Beijing 100190, China.

<sup>‡</sup> These authors contributed equally.

## 1. Particles size distribution histograms of Pd-1, Pd-2, Pd-3, Pd-4

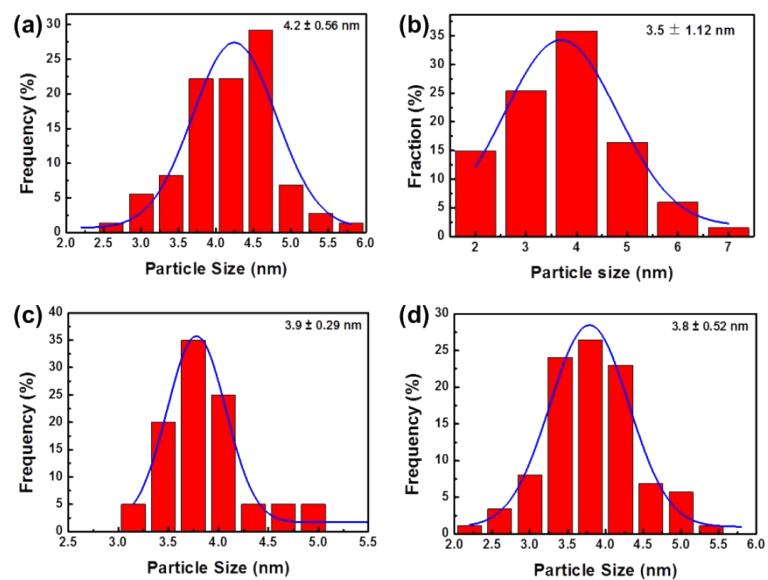

Figure S1. particles size distribution histograms of Pd-1 (a), Pd-2 (b), Pd-3 (c) and Pd-4 (d).

## 2. Particles size distribution histograms of recycle Pd-3

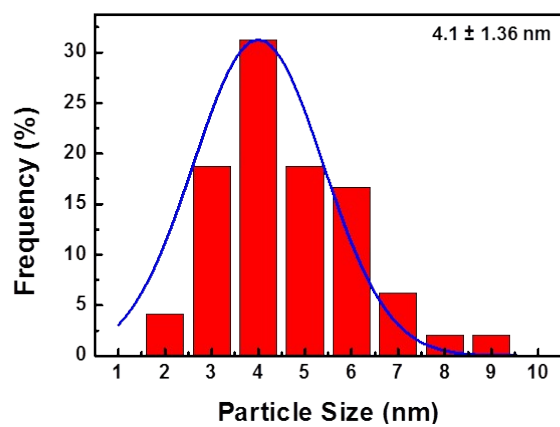

Figure S2. Particles size distribution histograms of Pd-3 catalyst after 10 cycles hydrogenation of 4-nitrotoluene.
